# Supplementary material
Source: PubMed Central journal article supplement (PMC3494898)
Supplement: 1210076109_pnas.201210076SI.pdf [file 1210076109_pnas.201210076SI.pdf]

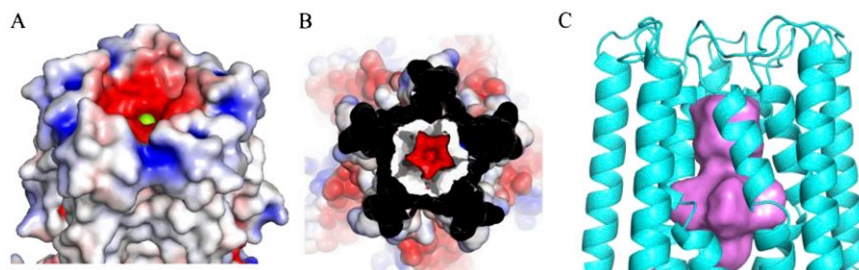

**Fig. 52.** Internal cavity. (A) Extraplasmic view onto the concavity, the same representation as in Fig. 2D. (B) The cross-section at the T264-ring is shown. (C) The internal cavity is highlighted in magenta. Protein subunits are in cyan. Note the helix kink.

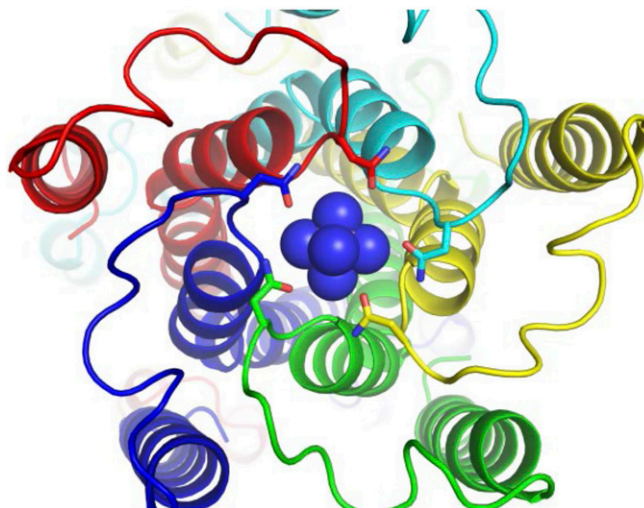

**Fig. 53.** Possible blockage of the selectivity filter by cobalt(III)hexamine. Cobalt(III)hexamine is well-known inhibitor of transport activity for CorA family. The manual docking of cobalt(III)hexamine and architecture of the selectivity filter suggest it to block the passage and thus prevent any transport.

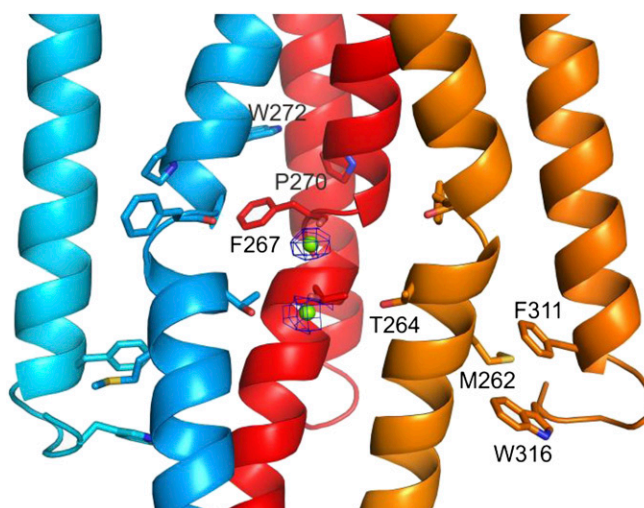

**Fig. 54.** The T264-ring. Close view onto Thr264 and Phe267 rings. Two Mg<sup>2+</sup> ions are shown as green spheres with 2F<sub>o</sub>-F<sub>c</sub> electron density contoured at 1.5 σ. Two monomers are omitted for clarity. Note that the kink caused by P270 in the helix is enhanced by pulling of Phe267 by Trp272 from an adjacent subunit.

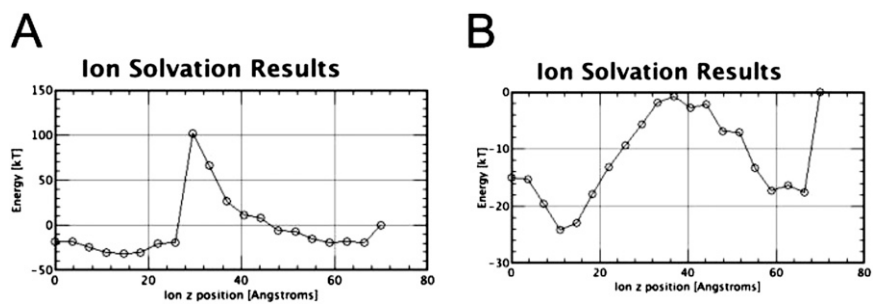

**Fig. 55.** Ion permeation profile. (A) Closed conformation. Note the significant energetic barrier caused by the hydrophobic lock. (B) Putative open form with the energetic barrier removed. Both graphs generated by APBSmem.



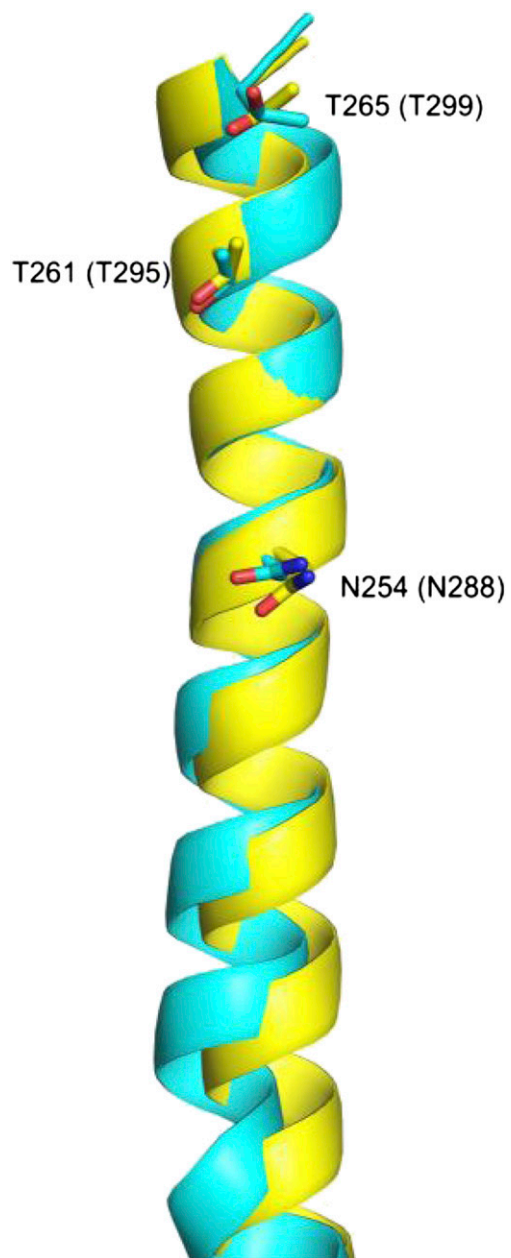

**Fig. S7.** Superposition of helix-6 (MjCorA, yellow) with helix-7 (TmCorA, cyan). The hydrophilic residues suggested to be involved in ion transport are shown as sticks (numbering in the parentheses is for TmCorA). The rmsd is  $\sim 1.2$  Å.



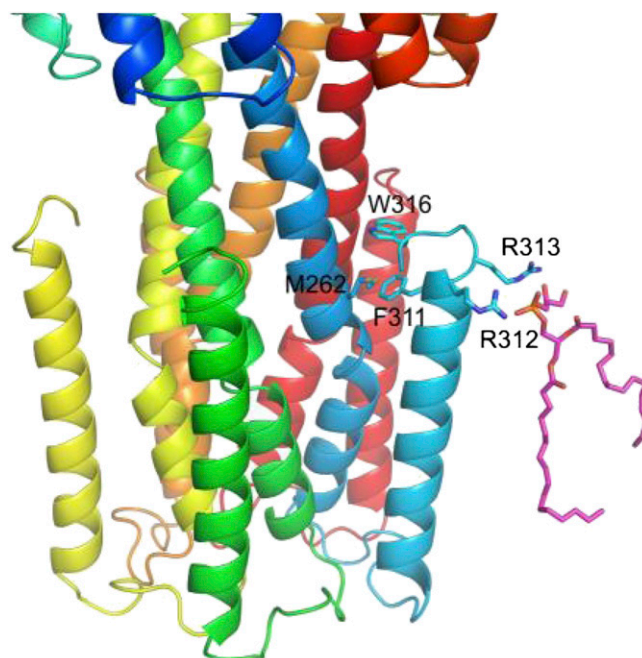

**Fig. S10.** Possible fixation of TM2 in the lipid matrix. The fixation of TM2 is most possibly facilitated by the salt-bridge formation between R312, R313, and the negatively charged head groups of lipids of the cytoplasmic membrane. The modeled lipid molecule (in stick) is just for illustration of this possibility. F311 and W316 on TM2 interact with and hold M271 on TM1.

**Table S1. Data collection and refinement statistics (highest resolution shell is shown in parentheses)**

| Data and refinement statistics       | Native-soluble    | SeMet-soluble      | Native full-length                |
|--------------------------------------|-------------------|--------------------|-----------------------------------|
| Data collection                      |                   |                    |                                   |
| Space group                          | P6 <sub>1</sub>   | P6 <sub>1</sub> 22 | P2 <sub>1</sub>                   |
| Cell dimensions                      |                   |                    |                                   |
| a, b, c (Å)                          | 68.3, 68.3, 241.9 | 66.8, 66.8, 248.6  | 103.1, 124.8, 111.9               |
| $\alpha$ , $\beta$ , $\gamma$ (°)    | 90.0, 90.0, 120.0 | 90.0, 90.0, 120.0  | 90.0, 90.8, 90.0                  |
| Numbers of reflections measured      | 492,488           | 61,235             | 198,461                           |
| Number of unique reflections         | 21,977            | 6,231              | 46,818                            |
| Resolution (Å)                       | 50–2.5 (2.6–2.5)  | 50–4 (4.1–4)       | 50–3.2 (3.3–3.2)                  |
| R <sub>merge</sub>                   | 0.1 (0.94)        | 0.05 (0.36)        | 0.16 (0.98)                       |
| I/ $\sigma$ I                        | 31.5 (2.6)        | 28 (4.7)           | 7.9 (1.08)                        |
| Completeness (%)                     | 99.8 (99.8)       | 94.1 (99.9)        | 99.8 (99.8)                       |
| Redundancy                           | 22.4 (8.75)       | 9.2 (4.8)          | 4.23 (4.2)                        |
| Refinement                           |                   |                    |                                   |
| Resolution (Å)                       | 47.7–2.5          |                    | 49.5–3.2                          |
| No. reflections (test set)           | 21,977 (1,099)    |                    | 46,813 (2,343)                    |
| R <sub>work</sub> /R <sub>free</sub> | 15.3/19.5         |                    | 20.9/28.2                         |
| No. atoms                            |                   |                    |                                   |
| Protein                              | 4,144             |                    | 12,981                            |
| Ligand/ion                           | 193 (alcohols)    |                    | 223/35 detergent/Mg <sup>2+</sup> |
| Water                                | 96                |                    | 197                               |
| B-factors                            |                   |                    |                                   |
| Protein                              | 68.1              |                    | 94.2                              |
| Ligand/ion                           | 74.5              |                    | 158.7/84.2                        |
| Water                                | 51.4              |                    | 61.7                              |
| R.m.s deviations                     |                   |                    |                                   |
| Bond lengths (Å)                     | 0.007             |                    | 0.010                             |
| Bond angles (°)                      | 1.34              |                    | 1.50                              |
| Ramachandran plot statistics (%)     |                   |                    |                                   |
| Favored regions                      | 95.8              |                    | 89.9                              |
| Allowed regions                      | 4.2               |                    | 10.1                              |
| Disallowed regions                   | 0.0               |                    | 0.0                               |
